# Supplementary material
Source: Springer Nature journal article supplement (https://www.springermedizin.de/resource/supplementary/12913_2012_2670_MOESM1_ESM.pdf/9531070)
Supplement: MOESM1 [file 9531070]

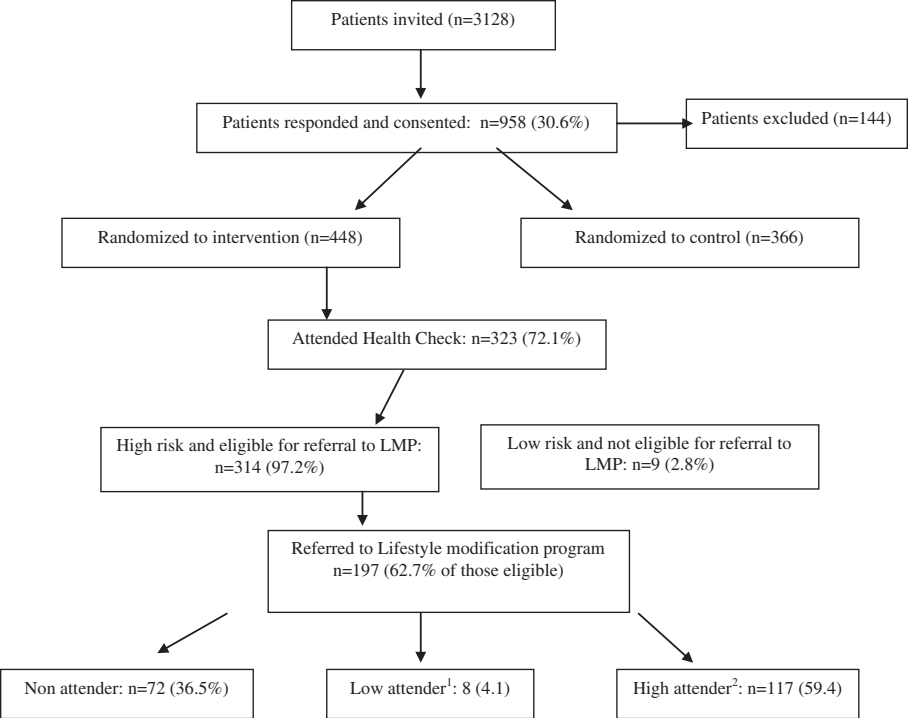

<sup>1</sup> Attended less than half of all group/individual sessions

<sup>2</sup> attended at least half of all group/individual sessions
